# Supplementary material
Source: MDPI journal article supplement (https://www.mdpi.com/2073-4344/11/12/1459)
Supplement: s1 [file s1]

### Supplementary Materials

#### Dual-cycle mechanism based kinetic model for DME-to-olefin synthesis on HZSM-5-type catalysts.

Maria Magomedova<sup>1,2</sup>, Anastasiya Starozhitskaya<sup>1\*</sup>, Ilya Davidov<sup>1</sup>, Anton Maximov<sup>1</sup>, Maksim Kravtsov<sup>3</sup>

<sup>1</sup> A.V. Topchiev Institute of Petrochemical Synthesis, RAS (TIPS RAS), 29, Leninsky prospekt, Moscow 119991, Russian Federation

<sup>2</sup> MIREA - Russian Technological University, 78, Vernadsky prospekt, Moscow 119454, Russian Federation

<sup>3</sup> I.I. Vorovich Institute of Mathematics, Mechanics, and Computer Science, Southern Federal University, 8a, Mil'chakova, Rostov-on-Don 344090, Russian Federation

\*Correspondence: av-star@ips.ac.ru; Tel.: +79267032733

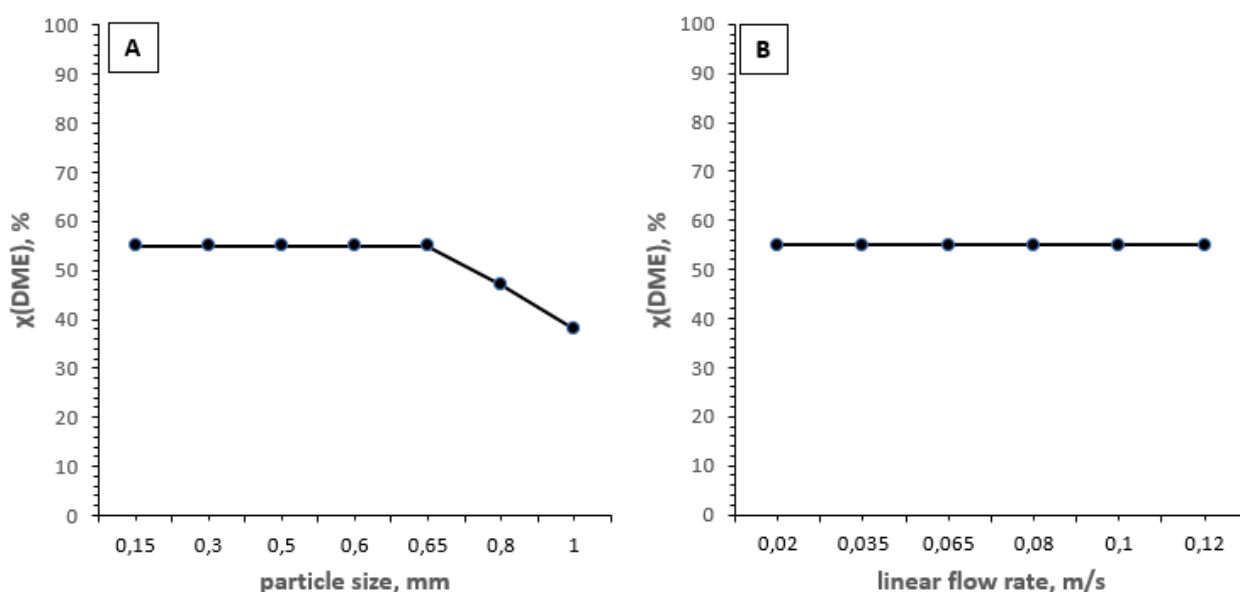

**Figure S1.** Dependence of DME conversion on the catalyst particle size (A) and linear flow rate (B). T = 320°C. Catalyst Mg-HZSM-5 / Al<sub>2</sub>O<sub>3</sub>.

**Table S1.** Reactions and equations of reaction rates.

|                                                                       | №   | Reaction                                                                                         | Reaction rates equations                                                |
|-----------------------------------------------------------------------|-----|--------------------------------------------------------------------------------------------------|-------------------------------------------------------------------------|
| <b>Interconversion of hydrocarbon pool intermediates</b>              | 1.  | $\text{CP} + \text{ZH} \rightarrow 2 \text{C}_3\text{H}_6$                                       | $r_1 = k_1$                                                             |
|                                                                       | 2.  | $2 \text{C}_3\text{H}_6 \rightarrow \text{CP} + \text{ZH}$                                       | $r_2 = k_2 \cdot C(\text{C}_3\text{H}_6)^2$                             |
| <b>Olefins methylation</b>                                            | 3.  | $\text{C}_2\text{H}_4 + \text{DME} \rightarrow \text{C}_3\text{H}_6 + \text{MeOH}$               | $r_3 = k_3 \cdot C(\text{C}_2\text{H}_4) \cdot C(\text{DME})$           |
|                                                                       | 4.  | $\text{C}_2\text{H}_4 + \text{MeOH} \rightarrow \text{C}_3\text{H}_6 + \text{H}_2\text{O}$       | $r_4 = k_4 \cdot C(\text{C}_2\text{H}_4) \cdot C(\text{MeOH})$          |
|                                                                       | 5.  | $\text{C}_3\text{H}_6 + \text{DME} \rightarrow \text{C}_4\text{H}_8 + \text{MeOH}$               | $r_5 = k_5 \cdot C(\text{C}_3\text{H}_6) \cdot C(\text{DME})$           |
|                                                                       | 6.  | $\text{C}_3\text{H}_6 + \text{MeOH} \rightarrow \text{C}_4\text{H}_8 + \text{H}_2\text{O}$       | $r_6 = k_6 \cdot C(\text{C}_3\text{H}_6) \cdot C(\text{MeOH})$          |
|                                                                       | 7.  | $\text{C}_4\text{H}_8 + \text{DME} \rightarrow \text{C}_5\text{H}_{10} + \text{MeOH}$            | $r_7 = k_7 \cdot C(\text{C}_4\text{H}_8) \cdot C(\text{DME})$           |
|                                                                       | 8.  | $\text{C}_4\text{H}_8 + \text{MeOH} \rightarrow \text{C}_5\text{H}_{10} + \text{H}_2\text{O}$    | $r_8 = k_8 \cdot C(\text{C}_4\text{H}_8) \cdot C(\text{MeOH})$          |
|                                                                       | 9.  | $\text{C}_5\text{H}_{10} + \text{DME} \rightarrow \text{C}_6\text{H}_{12} + \text{MeOH}$         | $r_9 = k_9 \cdot C(\text{C}_5\text{H}_{10}) \cdot C(\text{DME})$        |
|                                                                       | 10. | $\text{C}_5\text{H}_{10} + \text{MeOH} \rightarrow \text{C}_6\text{H}_{12} + \text{H}_2\text{O}$ | $r_{10} = k_{10} \cdot C(\text{C}_5\text{H}_{10}) \cdot C(\text{MeOH})$ |
| <b>Olefins dimerization, cracking</b>                                 | 11. | $\text{C}_6\text{H}_{12} \rightarrow 2 \text{C}_3\text{H}_6$                                     | $r_{11} = k_{11} \cdot C(\text{C}_6\text{H}_{12})$                      |
|                                                                       | 12. | $2 \text{C}_3\text{H}_6 \rightarrow \text{C}_6\text{H}_{12}$                                     | $r_{12} = k_{12} \cdot C(\text{C}_3\text{H}_6)^2$                       |
|                                                                       | 13. | $\text{C}_6\text{H}_{12} \rightarrow \text{C}_2\text{H}_4 + \text{C}_4\text{H}_8$                | $r_{13} = k_{13} \cdot C(\text{C}_6\text{H}_{12})$                      |
| <b>Interconversion of hydrocarbon pool intermediates</b>              | 14. | $\text{C}_6\text{H}_{12} \rightarrow \text{CP} + \text{ZH}$                                      | $r_{14} = k_{14} \cdot C(\text{C}_6\text{H}_{12})$                      |
|                                                                       | 15. | $\text{CP} \rightarrow \text{C}_6 + 5 \text{ZH}$                                                 | $r_{15} = k_{15}$                                                       |
|                                                                       | 16. | $\text{C}_6 + 5 \text{ZH} \rightarrow \text{CP}$                                                 | $r_{16} = k_{16}$                                                       |
| <b>Aromatics methylation</b>                                          | 17. | $\text{C}_6 + 2 \text{DME} \rightarrow \text{C}_8 + 2 \text{MeOH}$                               | $r_{17} = k_{17} \cdot C(\text{DME})^{\alpha_{17-18}}$                  |
|                                                                       | 18. | $\text{C}_6 + 2 \text{MeOH} \rightarrow \text{C}_8 + 2 \text{H}_2\text{O}$                       | $r_{18} = k_{18} \cdot C(\text{MeOH})^{\alpha_{17-18}}$                 |
| <b>Aromatics formation<br/>Dealkylation of aromatic intermediates</b> | 19. | $\text{C}_8 \rightarrow \text{C}_8\text{H}_{10}$                                                 | $r_{19} = k_{19}$                                                       |
|                                                                       | 20. | $\text{C}_8\text{H}_{10} + 4 \text{ZH} \rightarrow 2 \text{CH}_4 + \text{C}_6$                   | $r_{20} = k_{20}$                                                       |
|                                                                       | 21. | $\text{C}_8 \rightarrow \text{C}_6 + \text{C}_2\text{H}_4$                                       | $r_{21} = k_{21}$                                                       |
| <b>Reversible reaction of DME hydration</b>                           | 22. | $\text{DME} + \text{H}_2\text{O} \rightarrow 2 \text{MeOH}$                                      | $r_{22} = k_{22} \cdot C(\text{DME}) \cdot C(\text{H}_2\text{O})$       |
|                                                                       | 23. | $2 \text{MeOH} \rightarrow \text{DME} + \text{H}_2\text{O}$                                      | $r_{23} = k_{23} \cdot C(\text{MeOH})^2$                                |
| <b>Alkanes formation</b>                                              | 24. | $\text{C}_2\text{H}_4 + 2 \text{ZH} \rightarrow \text{C}_2\text{H}_6$                            | $r_{24} = k_{24} \cdot C(\text{C}_2\text{H}_4)^{\alpha_{24}}$           |
|                                                                       | 25. | $\text{C}_3\text{H}_6 + 2 \text{ZH} \rightarrow \text{C}_3\text{H}_8$                            | $r_{25} = k_{25} \cdot C(\text{C}_3\text{H}_6)^{\alpha_{25}}$           |
|                                                                       | 26. | $\text{C}_4\text{H}_8 + 2 \text{ZH} \rightarrow \text{C}_4\text{H}_{10}$                         | $r_{26} = k_{26} \cdot C(\text{C}_4\text{H}_8)^{\alpha_{26}}$           |
|                                                                       | 27. | $\text{C}_5\text{H}_{10} + 2 \text{ZH} \rightarrow \text{C}_5\text{H}_{12}$                      | $r_{27} = k_{27} \cdot C(\text{C}_5\text{H}_{10})^{\alpha_{27}}$        |

**Table S2.** Reaction orders with respect to the component.

|                  | Component                      | Mg-HZSM-5 / Al <sub>2</sub> O <sub>3</sub> | HZSM-5 / Al <sub>2</sub> O <sub>3</sub> | Zr-HZSM-5 / Al <sub>2</sub> O <sub>3</sub> |
|------------------|--------------------------------|--------------------------------------------|-----------------------------------------|--------------------------------------------|
| $\alpha_{17-18}$ | DME/MeOH                       | 1.98                                       | 2.00                                    | 1.49                                       |
| $\alpha_{24}$    | C <sub>2</sub> H <sub>4</sub>  | 0.00                                       | 0.27                                    | 0.09                                       |
| $\alpha_{25}$    | C <sub>3</sub> H <sub>6</sub>  | 1.39                                       | 1.38                                    | 1.29                                       |
| $\alpha_{26}$    | C <sub>4</sub> H <sub>8</sub>  | 0.86                                       | 1.20                                    | 1.16                                       |
| $\alpha_{27}$    | C <sub>5</sub> H <sub>10</sub> | 0.54                                       | 0.43                                    | 0.59                                       |

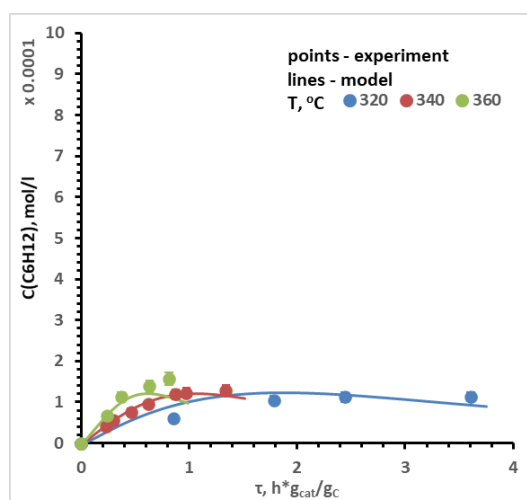

**Figure S2.** Calculated and experimental dependencies of the hexenes concentrations on specified contact time at  $T = 320\text{--}360^\circ\text{C}$ . Catalyst Mg-HZSM-5 /  $\text{Al}_2\text{O}_3$ .

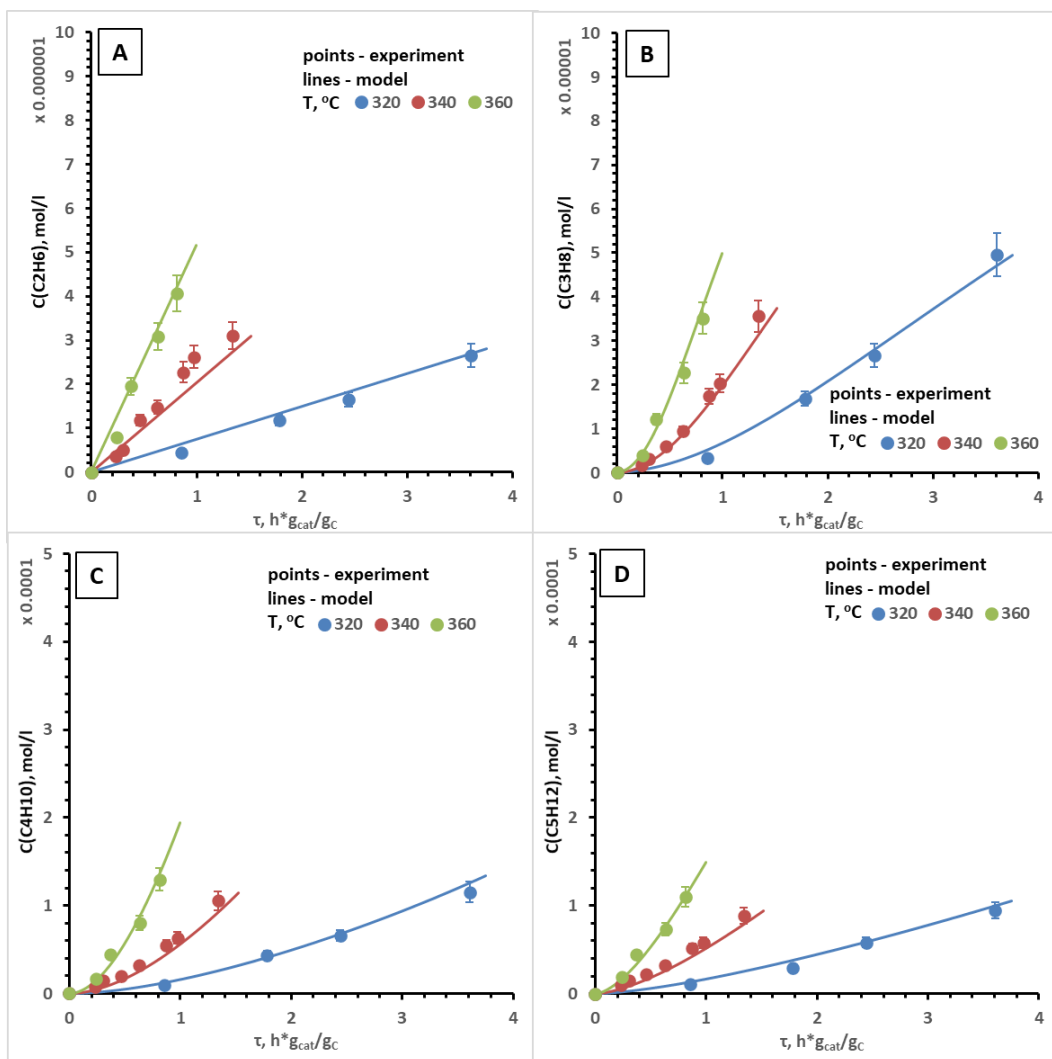

**Figure S3.** Calculated and experimental dependencies of the concentrations of Ethane (A), Propane (B), Butanes (C), Pentanes (D) on specified contact time at  $T = 320\text{-}360^\circ\text{C}$ . Catalyst  $\text{Mg-HZSM-5} / \text{Al}_2\text{O}_3$ .

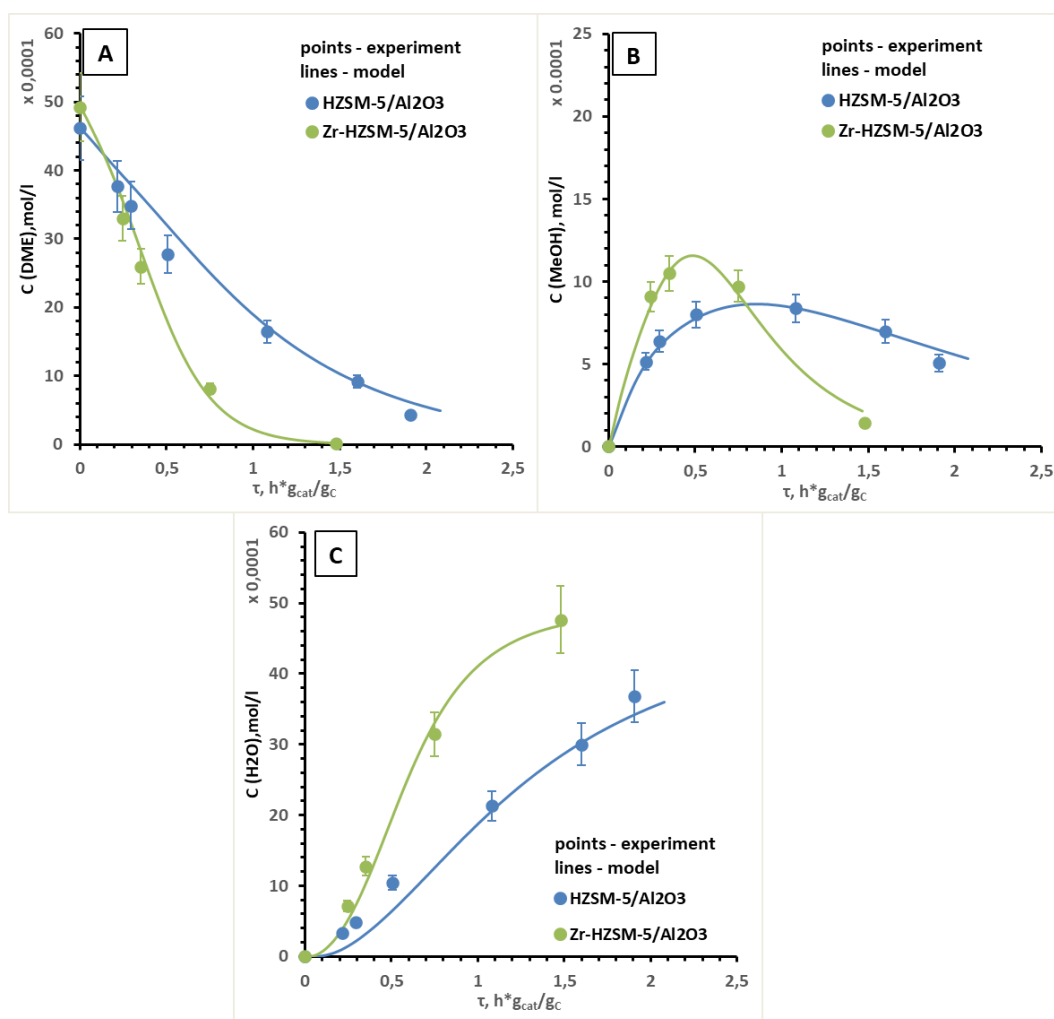

**Figure S4.** Calculated and experimental dependencies of the concentrations of DME (A), Methanol (B), and Water (C) on specified contact time at  $T = 320^\circ\text{C}$ . Catalysts HZSM-5 / Al<sub>2</sub>O<sub>3</sub> and Zr-HZSM-5 / Al<sub>2</sub>O<sub>3</sub>.

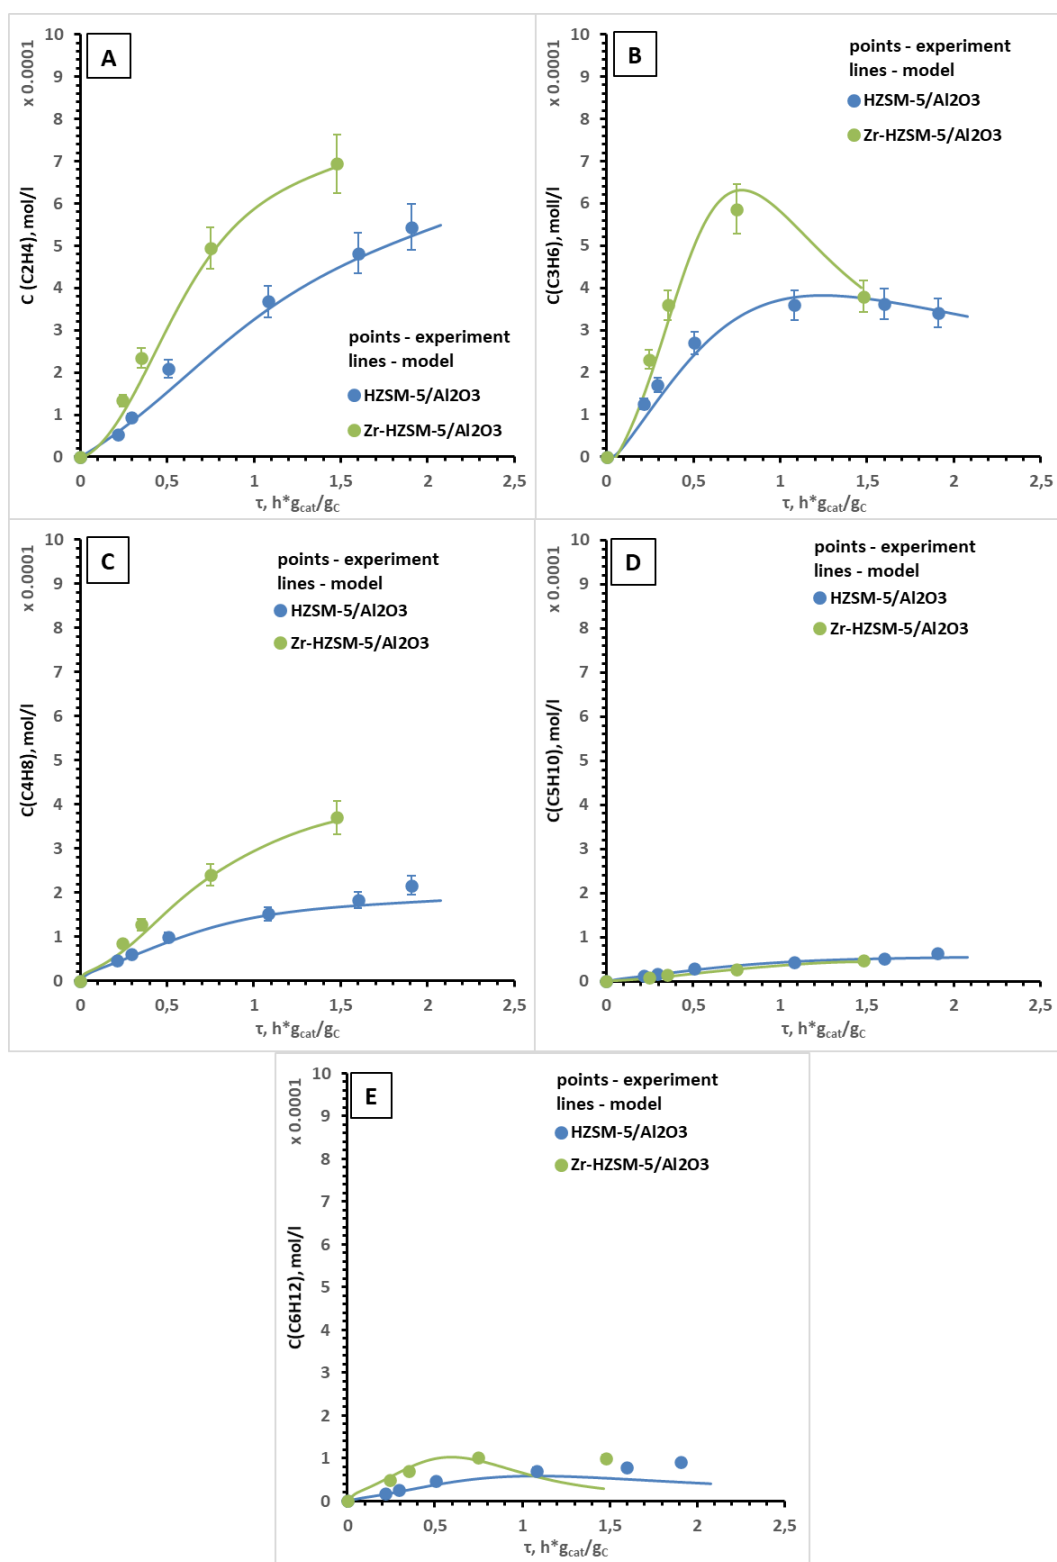

**Figure S5.** Calculated and experimental dependencies of the concentrations of Ethylene (A), Propylene (B), Butenes (C), Pentenes (D) and Hexenes (E) on specified contact time at  $T = 320^\circ\text{C}$ . Catalysts HZSM-5 / Al<sub>2</sub>O<sub>3</sub> and Zr-HZSM-5 / Al<sub>2</sub>O<sub>3</sub>.

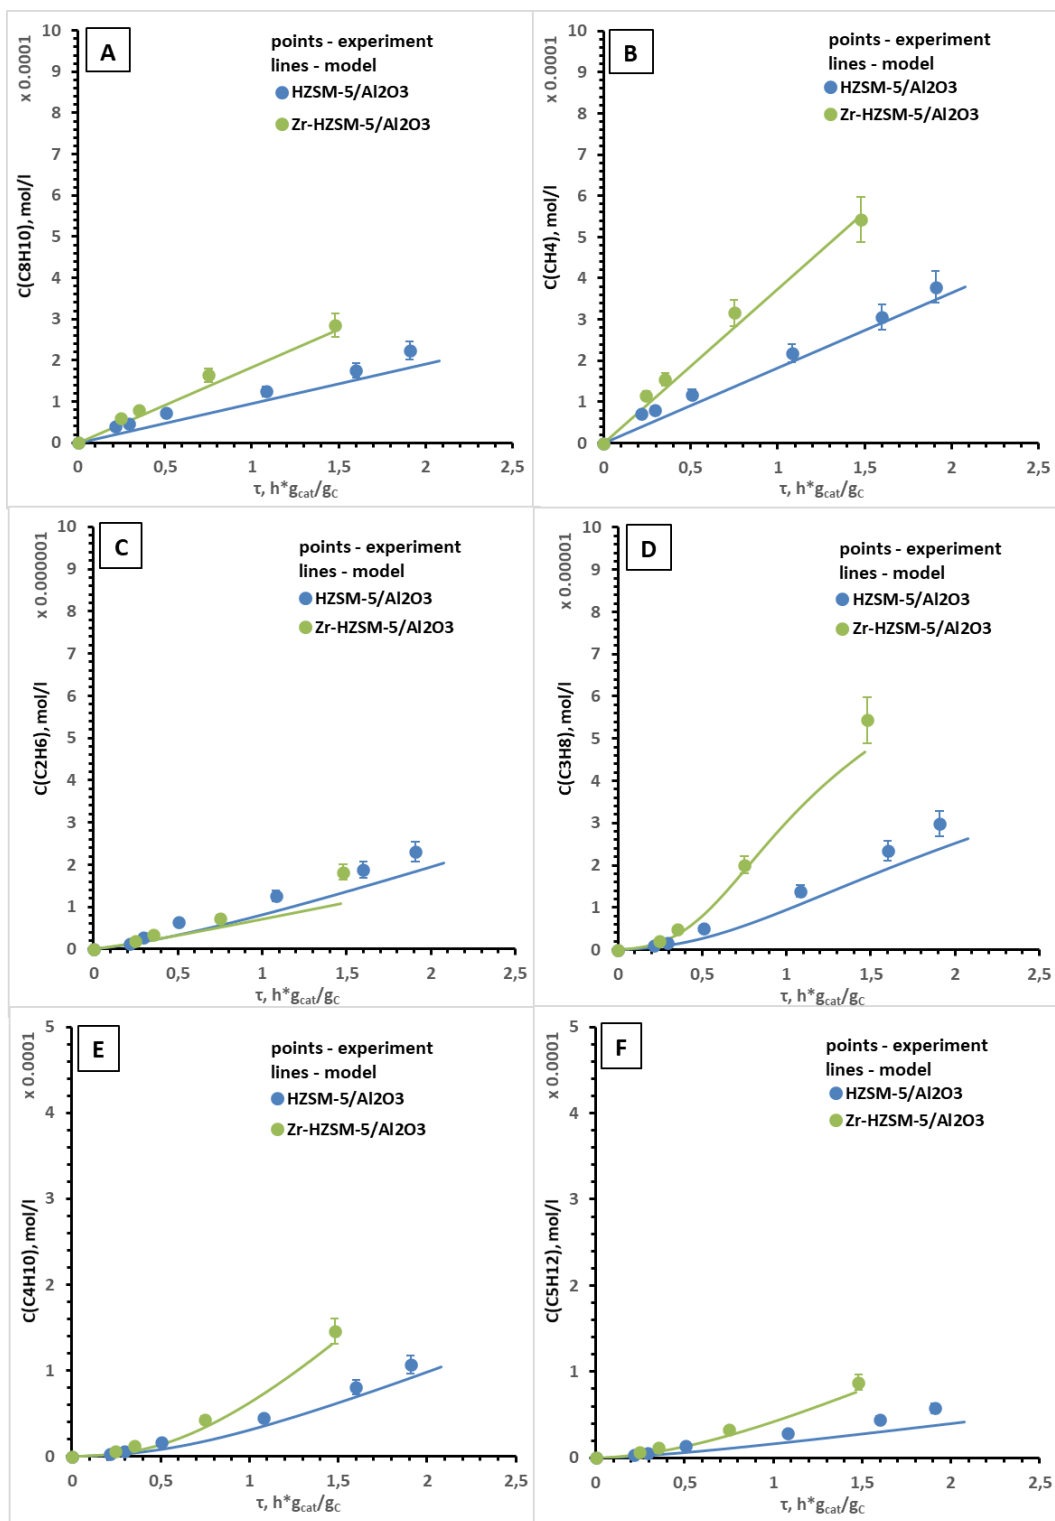

**Figure S6.** Calculated and experimental dependencies of the concentrations of Ethylene Aromatics C<sub>8</sub>H<sub>10</sub> (A), Methane (B), Ethane (C), Propane (D), Butane (E), and Pentane (F) on specified contact time at T = 320°C. Catalysts HZSM-5 / Al<sub>2</sub>O<sub>3</sub> and Zr-HZSM-5 / Al<sub>2</sub>O<sub>3</sub>.

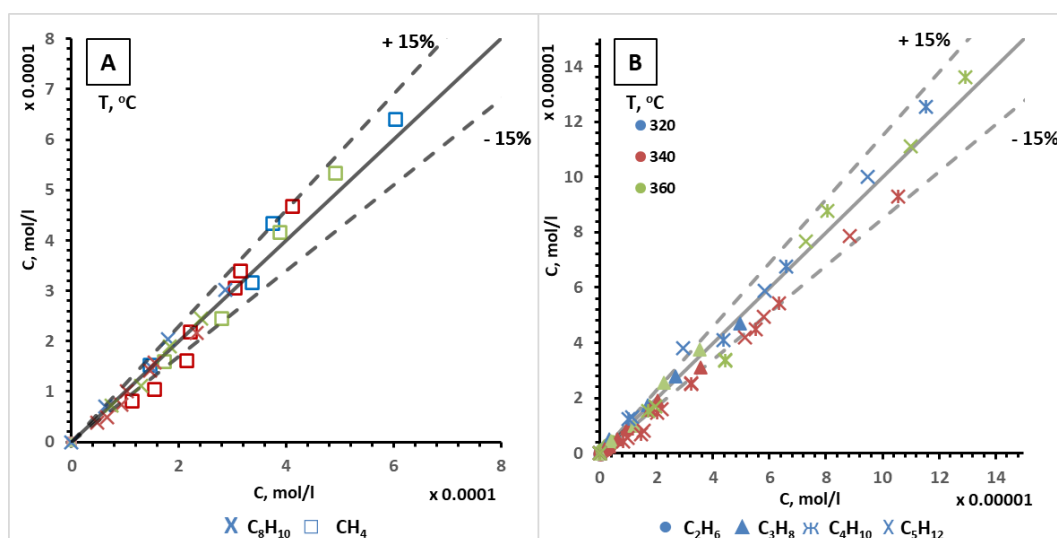

**Figure S7.** Correlation of calculated and experimental concentrations of Aromatics  $C_8H_{10}$  and Methane (A), Alkanes  $C_2-C_5$  (B).  $T = 320-360^\circ C$ . Catalyst  $Mg-HZSM-5 / Al_2O_3$ .

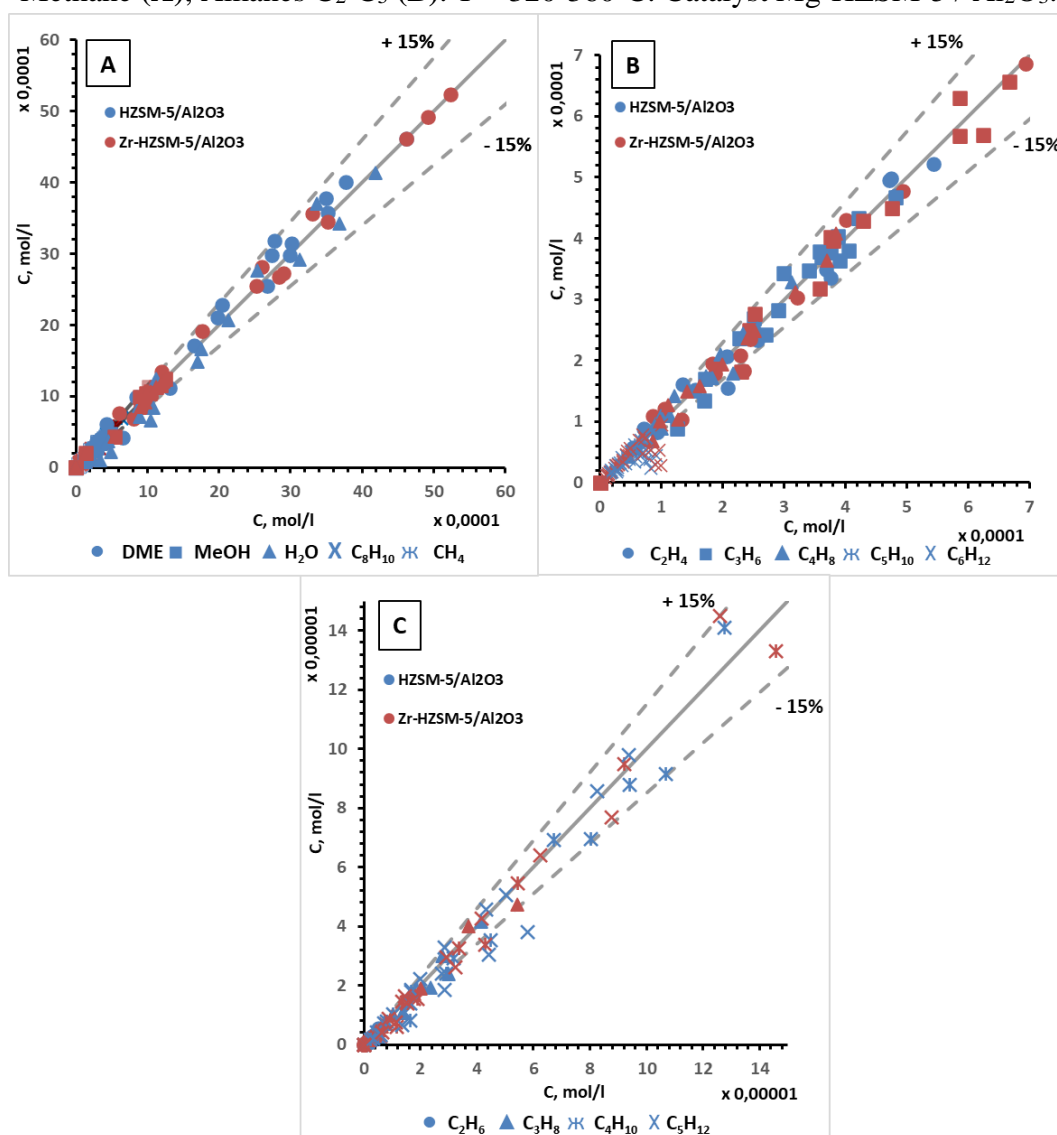

**Figure S8.** Correlation of calculated and experimental concentrations of Oxygenates, aromatic compounds  $C_8H_{10}$  and Methane (A), Olefins  $C_2-C_6$  (B), Alkanes  $C_2-C_5$  (C).  $T = 320-360^\circ C$ . Catalysts  $HZSM-5 / Al_2O_3$  and  $Zr-HZSM-5 / Al_2O_3$ .



**Table S3.** Variance Analysis for the Kinetic Model.

| <b>Criterea</b>                        | <b>Mg-HZSM-5 / Al<sub>2</sub>O<sub>3</sub></b> | <b>HZSM-5 / Al<sub>2</sub>O<sub>3</sub></b> | <b>Zr-HZSM-5 / Al<sub>2</sub>O<sub>3</sub></b> |
|----------------------------------------|------------------------------------------------|---------------------------------------------|------------------------------------------------|
| <b><math>\phi_f</math></b>             | $7.28 \cdot 10^{-7}$                           | $1.44 \cdot 10^{-6}$                        | $6.58 \cdot 10^{-7}$                           |
| <b><math>v_f</math></b>                | 139                                            | 181                                         | 111                                            |
| <b><math>S_f</math></b>                | $5.2 \cdot 10^{-9}$                            | $8.0 \cdot 10^{-9}$                         | $5.9 \cdot 10^{-9}$                            |
| <b><math>\phi_e^*</math></b>           | $3.7 \cdot 10^{-6}$                            | $4.6 \cdot 10^{-6}$                         | $3.1 \cdot 10^{-6}$                            |
| <b><math>v_e^*</math></b>              | 392                                            | 476                                         | 336                                            |
| <b><math>S_e</math></b>                | $9.4 \cdot 10^{-9}$                            | $9.6 \cdot 10^{-9}$                         | $9.2 \cdot 10^{-9}$                            |
| <b><math>S_f/S_e</math></b>            | 0.55                                           | 0.83                                        | 0.64                                           |
| <b><math>F_{0.05}(v_f, v_e)</math></b> | 1.25                                           | 1.21                                        | 1.28                                           |
| <b>significance test</b>               | valid                                          | valid                                       | valid                                          |

\*every experiment was repeated 2-4 times
